# Supplementary material
Source: MDPI journal article supplement (https://www.mdpi.com/2624-862X/3/2/22)
Supplement: s1 [file s1]

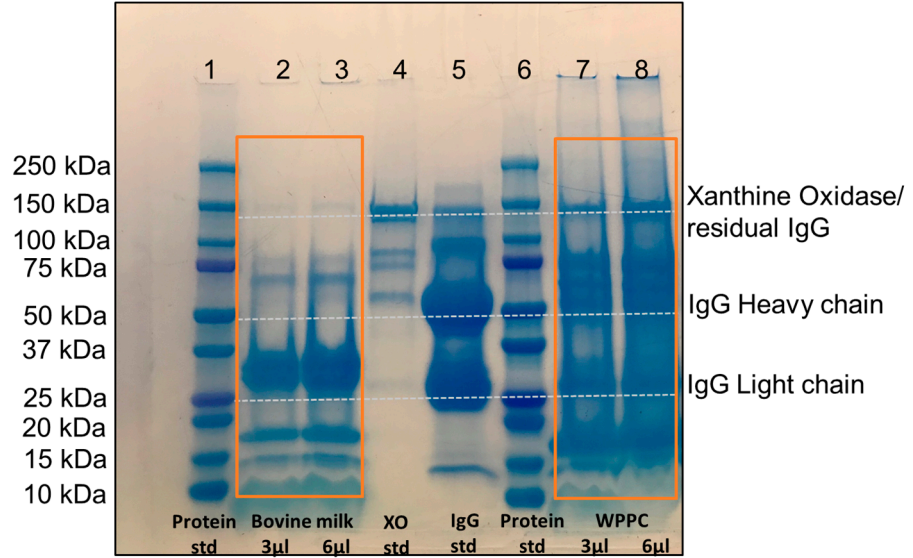

**Figure S1.** SDS-PAGE of whey protein phospholipid concentrate (WPPC) (sample 6B) and raw bovine milk: the band at 140 kDa was excised and used for confirmatory proteomics. Lane 1: precision plus protein standard; Lane 2: bovine milk (3µl); Lane 3: bovine milk (6µl); Lane 4: xanthine oxidase protein standard (10µl); Lane 5: IgG protein standard (10µl); Lane 6: precision plus protein standard (12µl); Lane 7: whey protein phospholipid concentrate (WPPC) (3µl); and Lane 8: whey protein phospholipid concentrate (WPPC) (6µl).

**Table S1.** Comparison of the volume mean diameter and size range of the fat globule population measured from all WPPC samples.

| Sample description             | Volume mean diameter (µm) | Size range (µm) |
|--------------------------------|---------------------------|-----------------|
| Sample 1A (liquid)             | 2.09 ± 0.10               | 0.265 to 22     |
| Sample 1B (liquid)             | 1.75 ± 0.02               | 0.315 to 13.08  |
| Sample 1 (powder)              | 15.85 ± 0.31              | 2.99 to 88      |
| Sample 2A (powder)             | 29.42 ± 1.02              | 0.265 to 248.9  |
| Sample 2B (powder)             | 30.10 ± 1.97              | 0.446 to 148    |
| Sample 3 (powder)              | 50.96 ± 1.32              | 3.57 to 296     |
| Sample 4A (powder)             | 20.68 ± 0.96              | 0.265 to 176    |
| Sample 4B (powder)             | 19.05 ± 0.24              | 0.315 to 148    |
| Sample 5 (powder)              | 66.00 ± 0.92              | 7.13 to 418     |
| Sample 6A (powder)             | 8.14 ± 0.49               | 0.315 to 124.5  |
| Sample 6B (liquid)             | 2.64 ± 0.01               | 0.375 to 13.08  |
| Fresh raw bovine milk (liquid) | 4 ± 0.04                  | 0.63 to 15.56   |

**Table S3.** Fatty acid composition per lipid fraction (%) for sample 1.

| <b>Lipid fraction</b> | <b>Total fatty acids</b> | <b>SM</b>     | <b>PC</b>    | <b>PS</b>    | <b>PI</b>    | <b>PE</b>    |
|-----------------------|--------------------------|---------------|--------------|--------------|--------------|--------------|
| 8:0                   | 0.17 ± 0.02              | ND            | ND           | ND           | ND           | 0.04 ± 0.06  |
| 10:0                  | 1.14 ± 0.11              | ND            | ND           | ND           | ND           | ND           |
| 11:0                  | 0.05 ± 0.00              | ND            | ND           | ND           | ND           | ND           |
| 12:0                  | 2.65 ± 0.14              | ND            | ND           | ND           | ND           | ND           |
| 13:0                  | 0.37 ± 0.05              | ND            | ND           | ND           | ND           | 1.04 ± 1.80  |
| 14:0                  | 10.77 ± 0.63             | ND            | 9.27 ± 1.14  | ND           | ND           | 0.81 ± 0.71  |
| 14:1                  | 0.81 ± 0.04              | ND            | ND           | ND           | 2.01 ± 3.48  | ND           |
| 15:0                  | 1.32 ± 0.07              | ND            | 1.25 ± 1.09  | ND           | ND           | ND           |
| 16:0                  | 36.09 ± 2.00             | 18.75 ± 16.32 | 42.78 ± 3.83 | 4.37 ± 3.79  | 10.22 ± 1.44 | 13.60 ± 0.31 |
| 16:1                  | 1.53 ± 0.09              | 35.86 ± 3.53  | 3.36 ± 1.06  | 10.81 ± 2.59 | 17.43 ± 4.23 | 3.72 ± 0.35  |
| 17:0                  | 0.66 ± 0.03              | ND            | ND           | ND           | ND           | ND           |
| 18:0                  | 11.70 ± 0.63             | ND            | 9.22 ± 0.80  | 40.20 ± 2.94 | 36.20 ± 4.46 | 12.80 ± 0.33 |
| 18:1cis+trans         | 24.79 ± 1.34             | ND            | 24.90 ± 1.66 | 31.50 ± 2.45 | 26.65 ± 2.62 | 46.66 ± 1.74 |
| 18:2 n6               | 5.01 ± 0.27              | ND            | 9.20 ± 0.64  | 13.13 ± 1.29 | 7.49 ± 0.86  | 17.15 ± 0.83 |
| 18:3 n6               | 0.04 ± 0.00              | ND            | ND           | ND           | ND           | 0.37 ± 0.64  |
| 18:3 n3               | 0.54 ± 0.03              | ND            | ND           | ND           | ND           | 0.37 ± 0.64  |
| 20:0                  | 0.21 ± 0.02              | ND            | ND           | ND           | ND           | ND           |
| 20:1 n9               | 0.18 ± 0.08              | ND            | ND           | ND           | ND           | ND           |
| 20:2 n6               | 0.05 ± 0.00              | ND            | ND           | ND           | ND           | ND           |
| 20:3 n6               | 0.40 ± 0.02              | ND            | ND           | ND           | ND           | 0.83 ± 0.72  |
| 20:4 n6               | 0.45 ± 0.02              | ND            | ND           | ND           | ND           | 1.70 ± 0.07  |
| 20:3 n3               | 0.01 ± 0.00              | ND            | ND           | ND           | ND           | 0.11 ± 0.20  |
| 20:5 n3               | 0.10 ± 0.00              | ND            | ND           | ND           | ND           | ND           |
| 22:0                  | 0.28 ± 0.03              | 23.93 ± 1.71  | ND           | ND           | ND           | ND           |
| 22:1 n9               | 0.02 ± 0.00              | ND            | ND           | ND           | ND           | ND           |
| 22:2 n6               | 0.15 ± 0.01              | ND            | ND           | ND           | ND           | ND           |
| 22:5 n6               | 0.04 ± 0.02              | ND            | ND           | ND           | ND           | 0.65 ± 1.13  |
| 22:5 n3               | 0.22 ± 0.01              | ND            | ND           | ND           | ND           | 0.15 ± 0.25  |
| 22:6n3                | 0.21 ± 0.03              | 21.47 ± 1.75  | ND           | ND           | ND           | ND           |
| 24:1                  | 0.02 ± 0.00              | ND            | ND           | ND           | ND           | ND           |

ND: Not detected.
